# Supplementary material for: Using high-throughput metabolomics to discover perturbed metabolic pathways and biomarkers of allergic rhinitis as potential targets to reveal the effects and mechanism of geniposide
Source: PubMed Central journal article supplement — RSC Adv. 2019 Jun 4;9(30):17490–500. doi: 10.1039/c9ra02166c (PMC9064603; doi:10.1039/c9ra02166c), 2019-06-04
Supplement: RA-009-C9RA02166C-s001.pdf [file RA-009-C9RA02166C-s001.pdf]

**Table S1** The differentially expressed metabolites in experimental allergic rhinitis mice using high-throughput metabolomics.

| No. | Ion | HMDB      | Compound         | Formula                                                         | m/z    | Rt(min) | Trends | Regulated |
|-----|-----|-----------|------------------|-----------------------------------------------------------------|--------|---------|--------|-----------|
| 1   | M-H | HMDB01547 | Corticosterone   | C <sub>21</sub> H <sub>30</sub> O <sub>4</sub>                  | 345.21 | 6.39    | ↑      | ●         |
| 2   | M-H | HMDB11481 | LysoPE(0:0/20:0) | C <sub>25</sub> H <sub>52</sub> N <sub>0</sub> O <sub>7</sub> P | 508.34 | 5.98    | ↑      | ●         |
| 3   | M-H | HMDB11761 | Cer(d18:0/18:0)  | C <sub>36</sub> H <sub>73</sub> N <sub>0</sub> O <sub>3</sub>   | 566.55 | 4.50    | ↑      |           |
| 4   | M-H | HMDB00296 | Uridine          | C <sub>9</sub> H <sub>12</sub> N <sub>2</sub> O <sub>6</sub>    | 243.06 | 0.65    | ↓      | ●         |
| 5   | M+H | HMDB00159 | L-Phenylalanine  | C <sub>9</sub> H <sub>11</sub> N <sub>0</sub> O <sub>2</sub>    | 166.08 | 2.98    | ↑      | ●         |
| 6   | M+H | HMDB13609 | D-Tryptophan     | C <sub>11</sub> H <sub>12</sub> N <sub>2</sub> O <sub>2</sub>   | 205.10 | 1.26    | ↓      | ●         |
| 7   | M+H | HMDB00034 | Adenine          | C <sub>5</sub> H <sub>5</sub> N <sub>5</sub>                    | 136.06 | 1.73    | ↓      |           |
| 8   | M+H | HMDB10381 | LysoPC(15:0)     | C <sub>23</sub> H <sub>48</sub> N <sub>0</sub> O <sub>7</sub> P | 482.32 | 10.06   | ↑      | ●         |
| 9   | M+H | HMDB00289 | Uric acid        | C <sub>5</sub> H <sub>4</sub> N <sub>4</sub> O <sub>3</sub>     | 169.04 | 0.69    | ↑      | ●         |
| 10  | M+H | HMDB00532 | Acetylglycine    | C <sub>4</sub> H <sub>7</sub> N <sub>0</sub> O <sub>3</sub>     | 118.05 | 1.89    | ↓      |           |
| 11  | M+H | HMDB12273 | Palmitic amide   | C <sub>16</sub> H <sub>33</sub> N <sub>0</sub> O                | 256.26 | 8.52    | ↑      | ●         |
| 12  | M+H | HMDB00742 | Homocysteine     | C <sub>4</sub> H <sub>9</sub> N <sub>0</sub> O <sub>2</sub> S   | 136.04 | 2.46    | ↓      |           |
| 13  | M-H | HMDB03423 | D-Glutamine      | C <sub>5</sub> H <sub>10</sub> N <sub>2</sub> O <sub>3</sub>    | 145.06 | 3.03    | ↓      | ●         |
| 14  | M+H | HMDB00517 | L-Arginine       | C <sub>6</sub> H <sub>14</sub> N <sub>4</sub> O <sub>2</sub>    | 175.12 | 0.60    | ↑      | ●         |
| 15  | M+H | HMDB01043 | Arachidonic acid | C <sub>20</sub> H <sub>32</sub> O <sub>2</sub>                  | 327.23 | 7.90    | ↑      | ●         |
| 16  | M-H | HMDB33780 | D-Asparagine     | C <sub>4</sub> H <sub>8</sub> N <sub>2</sub> O <sub>3</sub>     | 131.05 | 0.87    | ↓      | ●         |
| 17  | M-H | HMDB28762 | Aspartyl-Serine  | C <sub>7</sub> H <sub>12</sub> N <sub>2</sub> O <sub>6</sub>    | 219.06 | 1.66    | ↑      |           |
